# Supplementary material
Source: publisher figshare collection journal article supplement (https://acs.figshare.com/ndownloader/files/3939400)
Supplement: Supplementary file 1 [file 3939400]

## Supporting Information

# 7-Hydroxyflavone Revisited: Spectral, Acid-base Properties and interplay of the Protolytic Forms in the Ground and Excited States.

Illia E. Serdiuk,<sup>a,b</sup> Andrii S. Varenikov<sup>a</sup> and Alexander D. Roshal<sup>a\*</sup>

<sup>a</sup> Institute of Chemistry, Kharkiv V.N. Karazin National University, Svoboda 4, 61077 Kharkiv, Ukraine

<sup>b</sup> Faculty of Chemistry, University of Gdańsk, Wita Stwosza 63, 80-952 Gdańsk, Poland

### LIST OF CONTENTS:

| Item                                                                          | Page |
|-------------------------------------------------------------------------------|------|
| H <sub>0</sub> scale correction for the mixture methanol-water-sulphuric acid | 2    |
| Figure 1S                                                                     | 2    |
| Table 1S                                                                      | 2    |
| Regression analysis of solvatochromic and solvatofluorochromic effects        | 3    |
| Table 2S                                                                      | 3    |
| Structure of 7HF complexes in the ground and excited states                   | 4    |
| Figure 2S                                                                     | 4    |
| Calculation of Gibbs energy of hydrogen bond formation ( $\Delta G_{f,298}$ ) | 5    |
| Figure 3aS                                                                    | 5    |
| Figure 3bS                                                                    | 6    |
| Calculation Schemes                                                           | 6    |

## H<sub>0</sub> scale correction for the mixture methanol-water-sulphuric acid

Figure 1S. Correlation between H<sub>0</sub> scales in methanol-water-sulphuric acid and water-sulphuric acid.

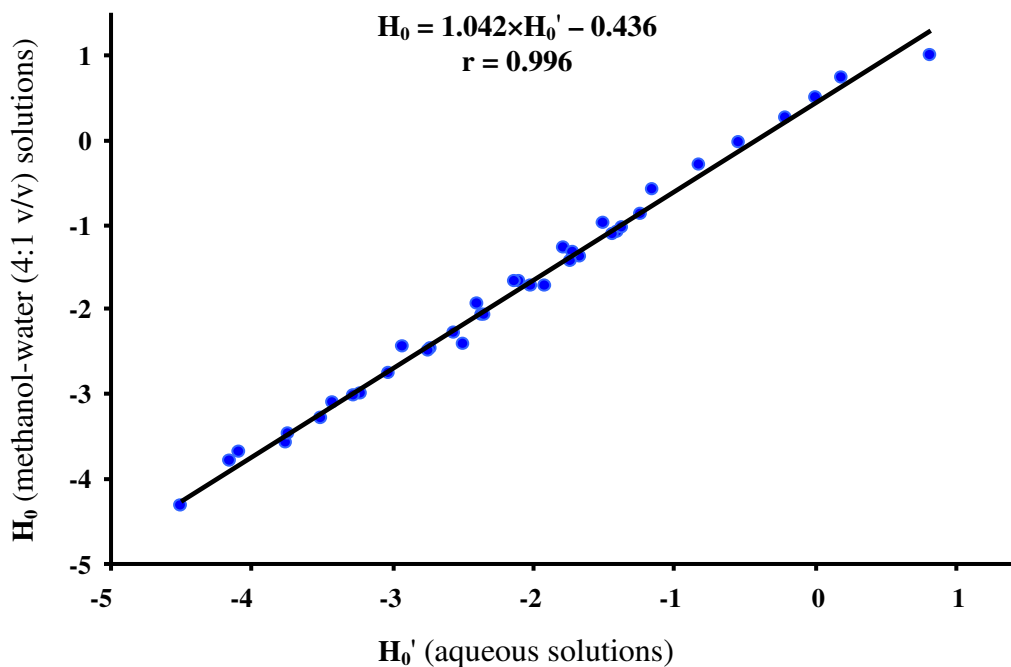

Table 1S. Dissociation constants of flavones used as H<sub>0</sub> indicators.

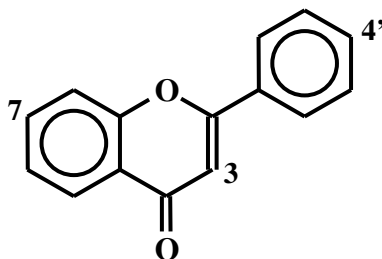

| Flavone         | 7-methoxy                   | 4'-hydroxy   | 3,4'-dimethoxy | 3-hydroxy-4'-methoxy | 3-hydroxy |
|-----------------|-----------------------------|--------------|----------------|----------------------|-----------|
| pK <sub>a</sub> | -0.72 ± 0.04;<br>-0.75 [17] | -0.93 ± 0.03 | -2.10 ± 0.03   | -2.37 ± 0.04         | -2.88 [6] |

## Regression analysis of solvatochromic and solvatofluorochromic effects

Table 2S. Statistical parameters of regression analysis equations.

| <i>N</i>   | Equation                                                              | <i>n</i> | <i>R</i> | <i>S</i> |
|------------|-----------------------------------------------------------------------|----------|----------|----------|
| <b>1a</b>  | $v_{\text{abs}} = -1791.2 \times \pi^* + 34045$                       | 7        | 0.906    | 350.85   |
| <b>1b</b>  | $v_{\text{abs}} = -5208.0 \times Y + 35050$                           | 7        | 0.880    | 393.10   |
| <b>2a</b>  | $v_{\text{abs}} = -3030.0 \times \pi^* + 2456.6 \times \beta + 34259$ | 14       | 0.806    | 672.92   |
| <b>2b</b>  | $v_{\text{abs}} = -6088.1 \times Y + 3.83 \times B + 35145$           | 14       | 0.747    | 643.04   |
| <b>3a</b>  | $v_{\text{fl}} = -1023.4 \times \pi^* - 1159.5 \times \beta + 26085$  | 14       | 0.810    | 236.87   |
| <b>3b</b>  | $v_{\text{fl}} = -3788.6 \times Y + 26330$                            | 14       | 0.760    | 250.83   |
| <b>4</b>   | $\Delta v_{\text{St}} = -2950 \times \beta + 10500$                   | 14       | 0.750    | 495.40   |
| <b>5a</b>  | $v_{\text{fl}}(A_p^*) = -1231.3 \times \pi^* + 19090$                 | 9        | 0.883    | 156.87   |
| <b>5b</b>  | $v_{\text{fl}}(A_p^*) = -16159 \times Y + 25845$                      | 9        | 0.947    | 107.33   |
| <b>6a</b>  | $\Delta v_{\text{St}}(A_p^*) = 2107.7 \times \pi^* + 13047$           | 9        | 0.943    | 178.69   |
| <b>6b</b>  | $\Delta v_{\text{St}}(A_p^*) = 13035 \times Y + 6.58 \times B + 6565$ | 9        | 0.949    | 182.20   |
| <b>7a</b>  | $v_{\text{fl}}(A^*) = -1696.7 \times \pi^* + 19560$                   | 9        | 0.954    | 128.07   |
| <b>7b</b>  | $v_{\text{fl}}(A^*) = -13660 \times Y - 3.80 \times B + 25850$        | 9        | 0.937    | 161.27   |
| <b>8a</b>  | $\Delta v_{\text{St}}(A^*) = 1473.4 \times \pi^* + 7635$              | 7        | 0.917    | 56.91    |
| <b>8b</b>  | $\Delta v_{\text{St}}(A^*) = 5795 \times Y + 5680$                    | 7        | 0.718    | 99.53    |
| <b>9a</b>  | $\Delta v_{\text{St}}(A^*) = 1461 \times \pi^* + 7955$                | 7        | 0.901    | 299.06   |
| <b>9b</b>  | $\Delta v_{\text{St}}(A^*) = 4683 \times Y + 7025$                    | 7        | 0.900    | 300.33   |
| <b>10a</b> | $\Delta v_{\text{St}}(A^*) = 378 \times \pi^* + 9860$                 | 7        | 0.700    | 85.90    |
| <b>10b</b> | $\Delta v_{\text{St}}(A^*) = 1050 \times Y + 9670$                    | 7        | 0.914    | 48.64    |
| <b>11</b>  | $\Delta v_{\text{St}}(A^*) = 2237 \times \pi^* + 7315$                | 7        | 0.890    | 101.90   |

*N* – number of the equation in the text of manuscript, *n* – quantity of solvents, *R* – correlation coefficient, *S* – standard error of estimate

## Structure of 7HF complexes in the ground and excited states

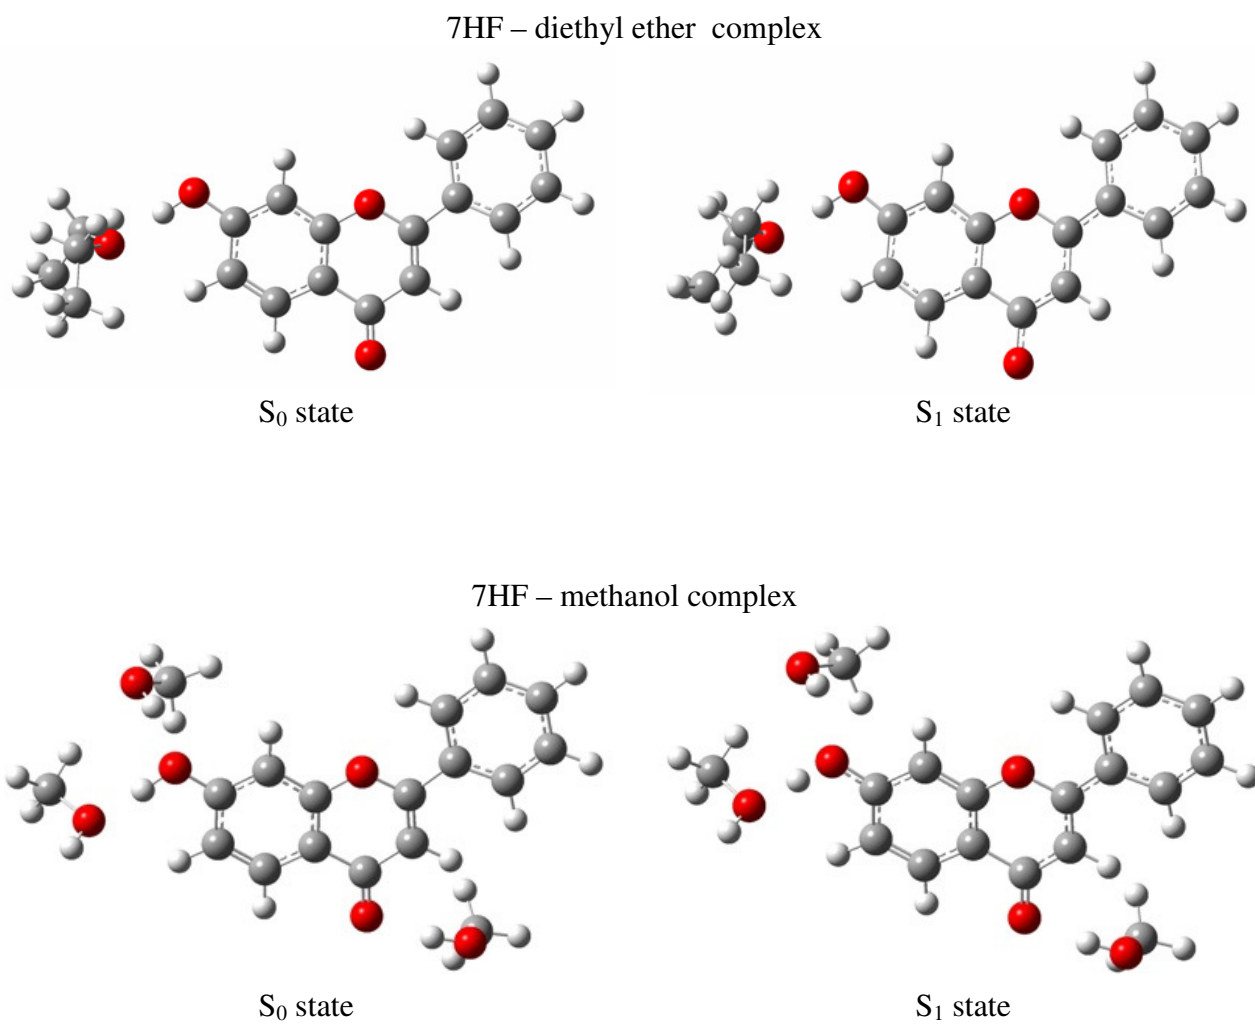

Figure 2S.

Calculation of Gibbs energy of hydrogen bond formation ( $\Delta G_{f,298}$ ).

**7HF – diethyl ether complex**

(geometry of complex and model molecules is optimized in the ground and excited states)

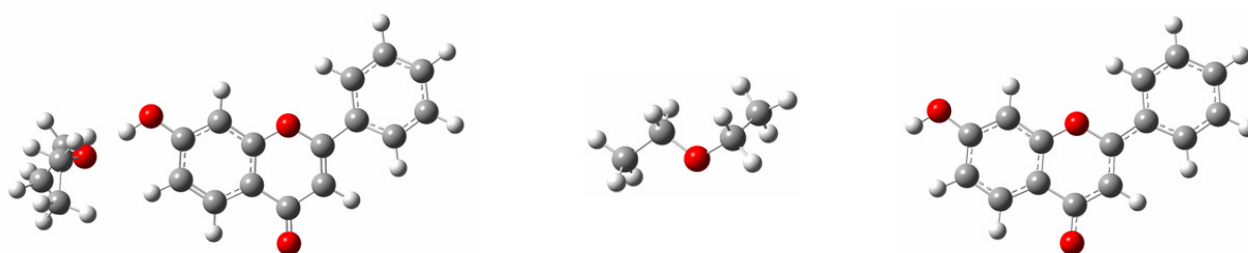

**complex 7HF – ether**

**ether**

**7HF**

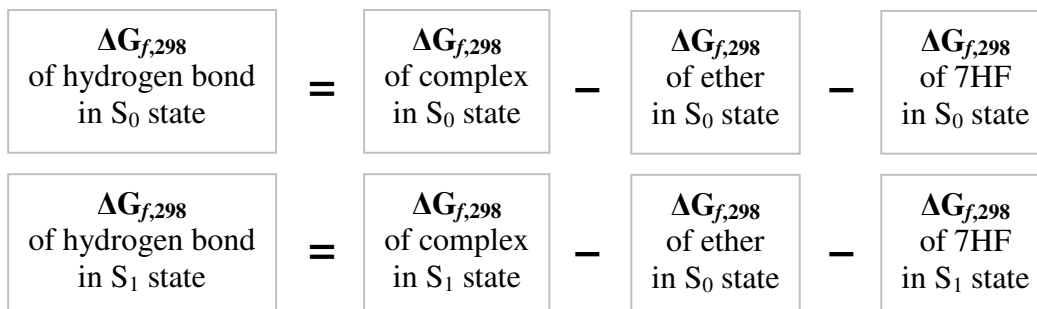

**Figure 3aS.**

### 7HF – methanol complex

(geometry of the complex and model molecules is optimized in the ground and excited states)

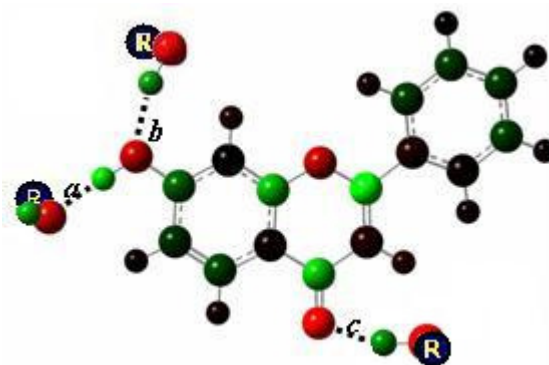

complex 7HF with three methanol molecules (R = CH<sub>3</sub>)

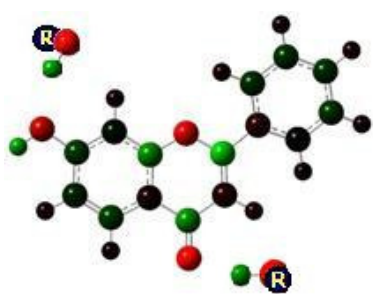

complex without hydrogen bond *a*

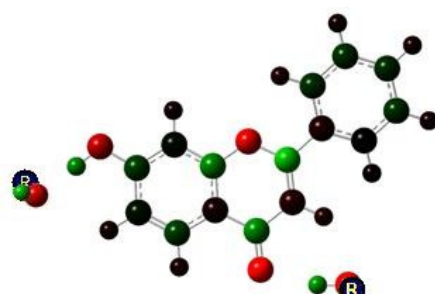

complex without hydrogen bond *b*

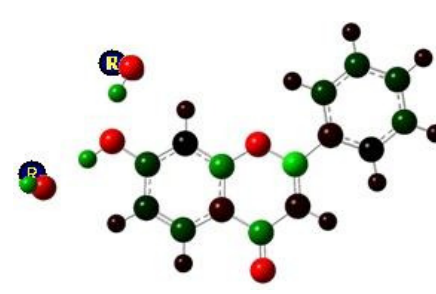

complex without hydrogen bond *c*

model structures

Figure 3bS.

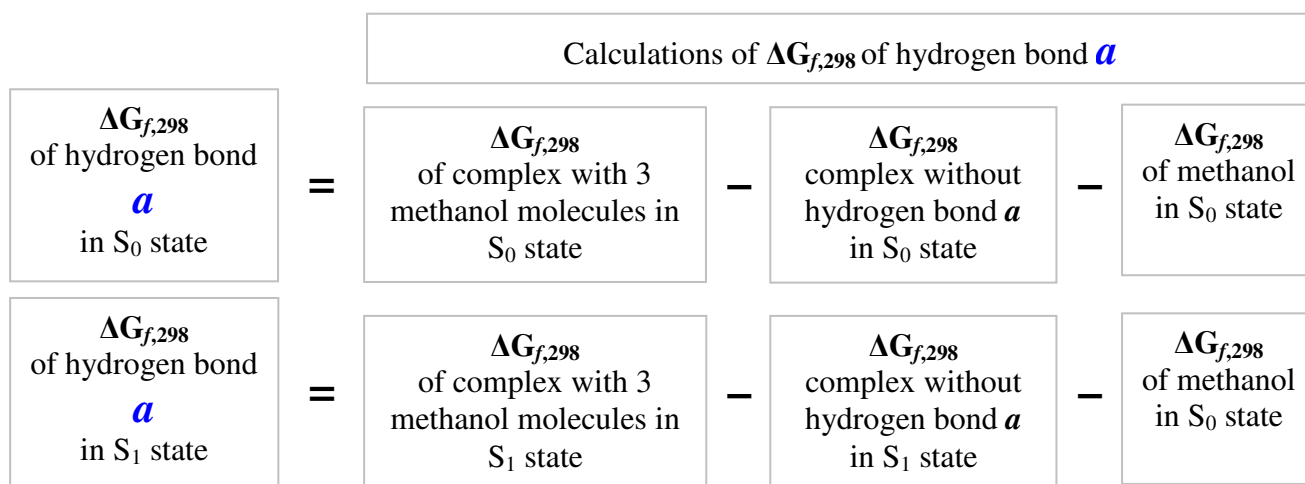

calculations of  $\Delta G_{f,298}$  of hydrogen bond *b*

|                                                                      |   |                                                                                 |   |                                                                                   |   |                                                     |
|----------------------------------------------------------------------|---|---------------------------------------------------------------------------------|---|-----------------------------------------------------------------------------------|---|-----------------------------------------------------|
| $\Delta G_{f,298}$<br>of hydrogen bond<br><i>b</i><br>in $S_0$ state | = | $\Delta G_{f,298}$<br>of complex with 3<br>methanol molecules in<br>$S_0$ state | - | $\Delta G_{f,298}$<br>complex without<br>hydrogen bond <i>b</i><br>in $S_0$ state | - | $\Delta G_{f,298}$<br>of methanol<br>in $S_0$ state |
| $\Delta G_{f,298}$<br>of hydrogen bond<br><i>b</i><br>in $S_1$ state | = | $\Delta G_{f,298}$<br>of complex with 3<br>methanol molecules in<br>$S_1$ state | - | $\Delta G_{f,298}$<br>complex without<br>hydrogen bond <i>b</i><br>in $S_1$ state | - | $\Delta G_{f,298}$<br>of methanol<br>in $S_0$ state |

calculations of  $\Delta G_{f,298}$  of hydrogen bond *c*

|                                                                      |   |                                                                                 |   |                                                                                   |   |                                                     |
|----------------------------------------------------------------------|---|---------------------------------------------------------------------------------|---|-----------------------------------------------------------------------------------|---|-----------------------------------------------------|
| $\Delta G_{f,298}$<br>of hydrogen bond<br><i>c</i><br>in $S_0$ state | = | $\Delta G_{f,298}$<br>of complex with 3<br>methanol molecules in<br>$S_0$ state | - | $\Delta G_{f,298}$<br>complex without<br>hydrogen bond <i>c</i><br>in $S_0$ state | - | $\Delta G_{f,298}$<br>of methanol<br>in $S_0$ state |
| $\Delta G_{f,298}$<br>of hydrogen bond<br><i>c</i><br>in $S_1$ state | = | $\Delta G_{f,298}$<br>of complex with 3<br>methanol molecules in<br>$S_1$ state | - | $\Delta G_{f,298}$<br>complex without<br>hydrogen bond <i>c</i><br>in $S_1$ state | - | $\Delta G_{f,298}$<br>of methanol<br>in $S_0$ state |
